# Supplementary material for: Electron transfer and energy exchange between a covalent organic framework and CuFeS2 nanoparticles
Source: Royal Society of Chemistry journal article supplement (doi:10.1039/d4tc01989j), 2024-01-01
Supplement: d4tc01989j1.pdf [file d4tc01989j1.pdf]

## Supporting Information

### Electron transfer and energy exchange between a covalent organic framework and CuFeS<sub>2</sub> nanoparticles

Panagiota Bika<sup>a</sup>, Vasileios K. Tzitzios<sup>a</sup>, Elias Sakellis<sup>a</sup>, Spyros Orfanoudakis<sup>a,b</sup>, Nikos Boukos<sup>a</sup>,  
Saeed M. Alhassan<sup>c</sup>, Polychronis Tsipas<sup>a,d</sup>, Vasileios Psycharis<sup>a</sup>, Thomas Stergiopoulos<sup>a\*</sup> and  
Panagiotis Dallas<sup>a\*\*</sup>

<sup>a</sup> *Institute of Nanoscience and Nanotechnology, NCSR Demokritos, 15341, Athens, Greece.*

<sup>b</sup> *School of Applied Mathematical and Physical Sciences, National Technical University  
Athens, 15780 Zografou, Athens, Greece.*

<sup>c</sup> *Department of Chemical Engineering, Khalifa University of Science and Technology, P.O. Box  
127788, Abu Dhabi, United Arab Emirates.*

<sup>d</sup> *National Institute of Materials Physics, Atomistilor 405A, Magurele, Romania.*

**Keywords:** fluorescence quenching, chalcogenides, covalent organic frameworks, plasmonic  
nanoparticles, Stern-Volmer analysis

\* [t.stergiopoulos@inn.demokritos.gr](mailto:t.stergiopoulos@inn.demokritos.gr); Tel: +302106503394

\*\* [p.dallas@inn.demokritos.gr](mailto:p.dallas@inn.demokritos.gr); Tel: +302106503311

## Supporting Information

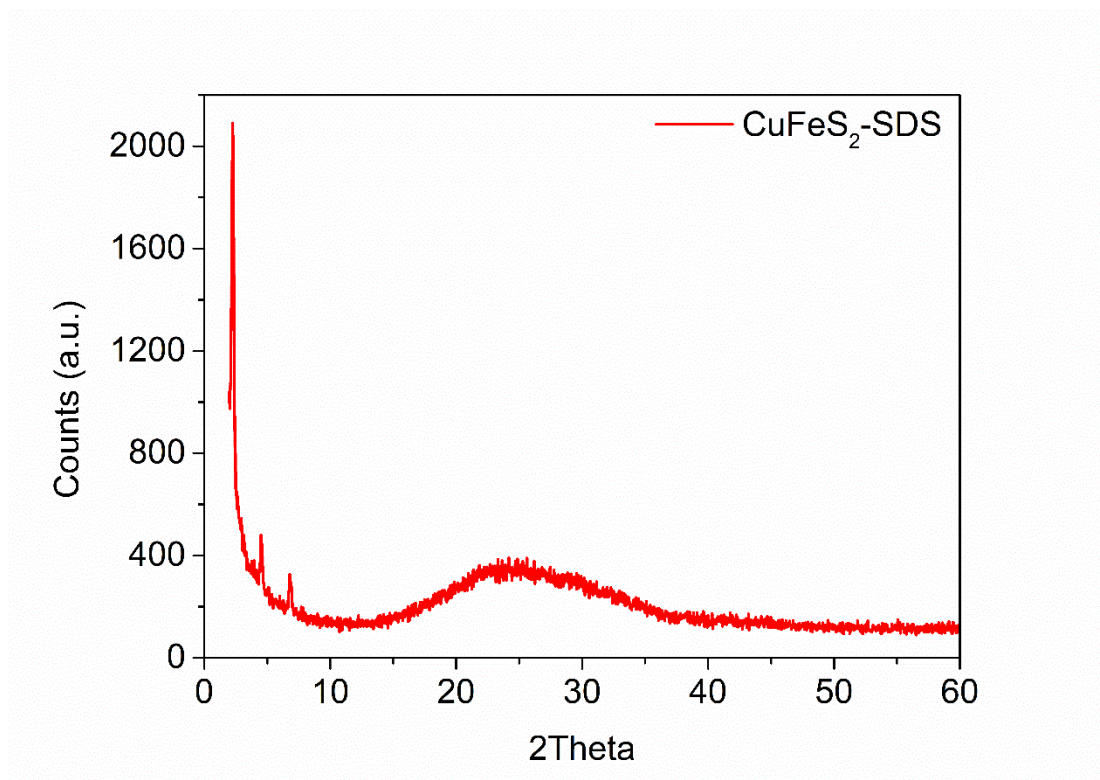

Figure S1. XRD pattern of the CuFeS<sub>2</sub>-SDS nanoparticles on a glass substrate.

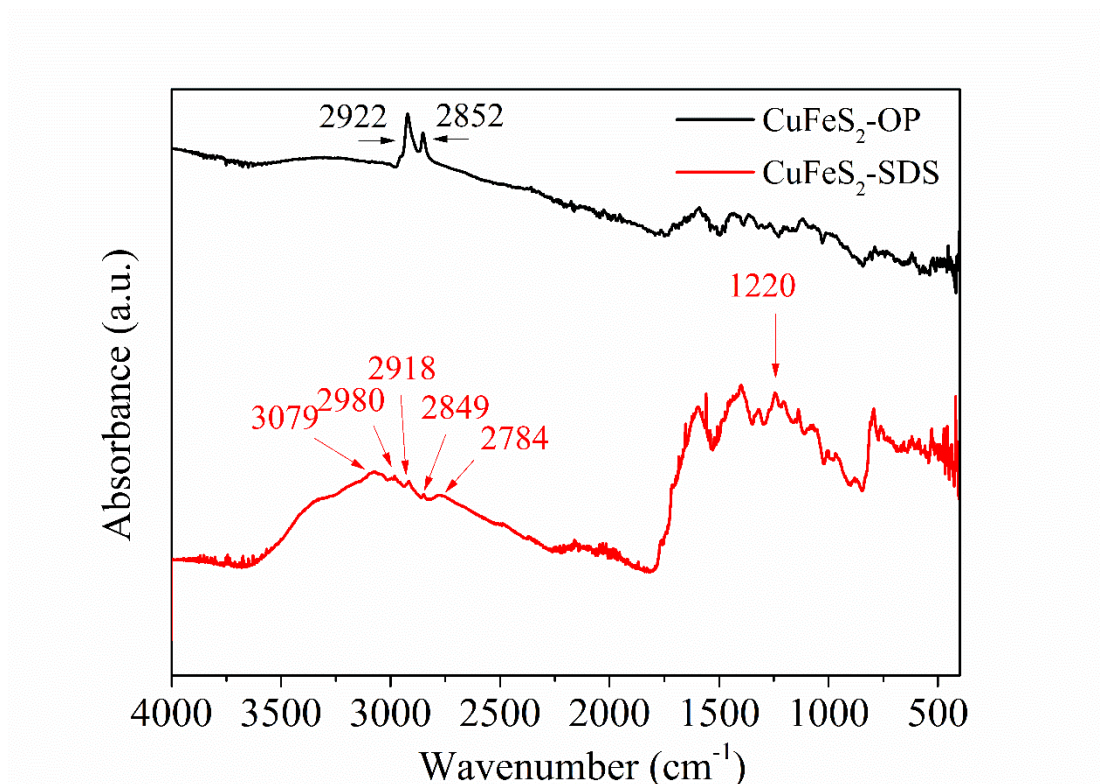

Figure S2. FTIR spectra of CuFeS<sub>2</sub>-OP vs the hydrophilic CuFeS<sub>2</sub>-SDS

## Supporting Information

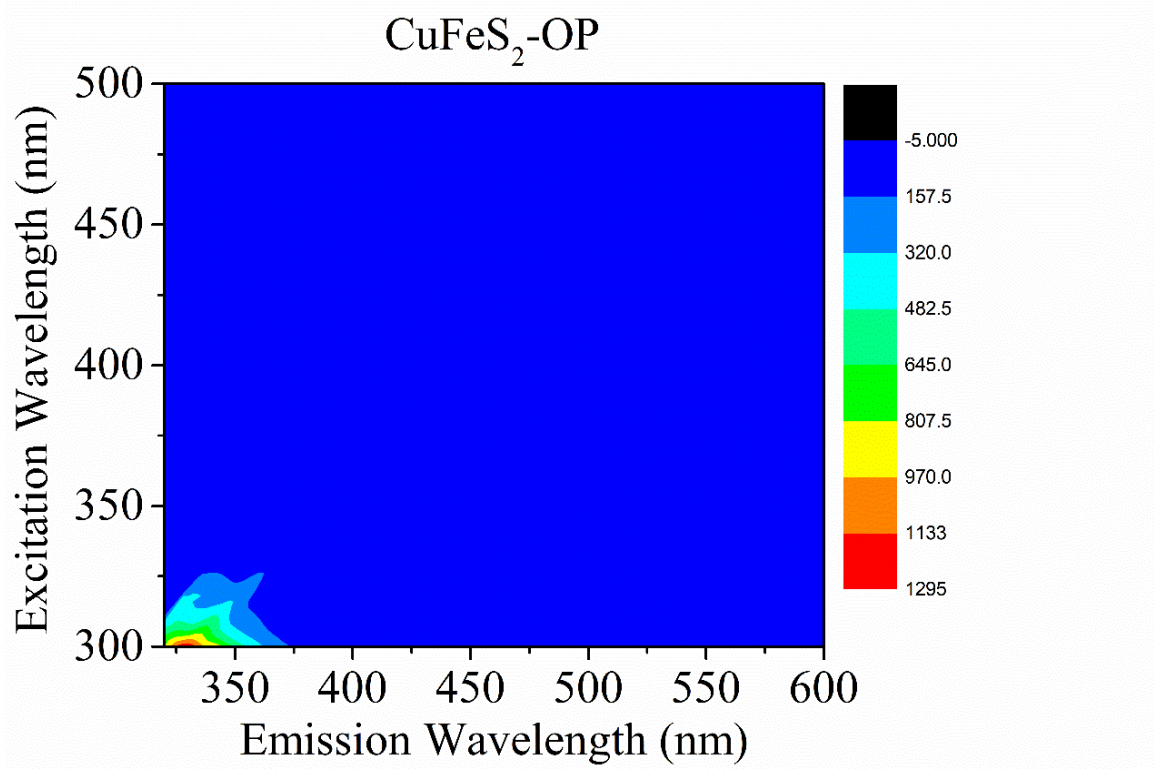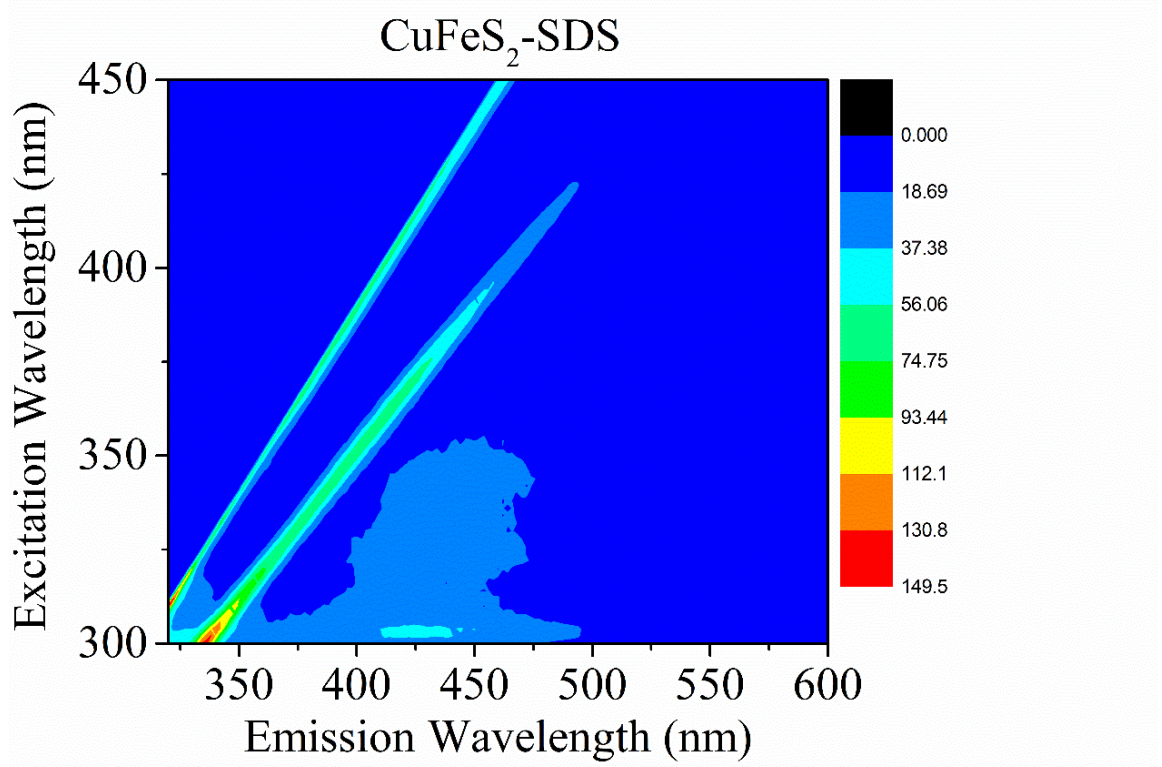

## Supporting Information

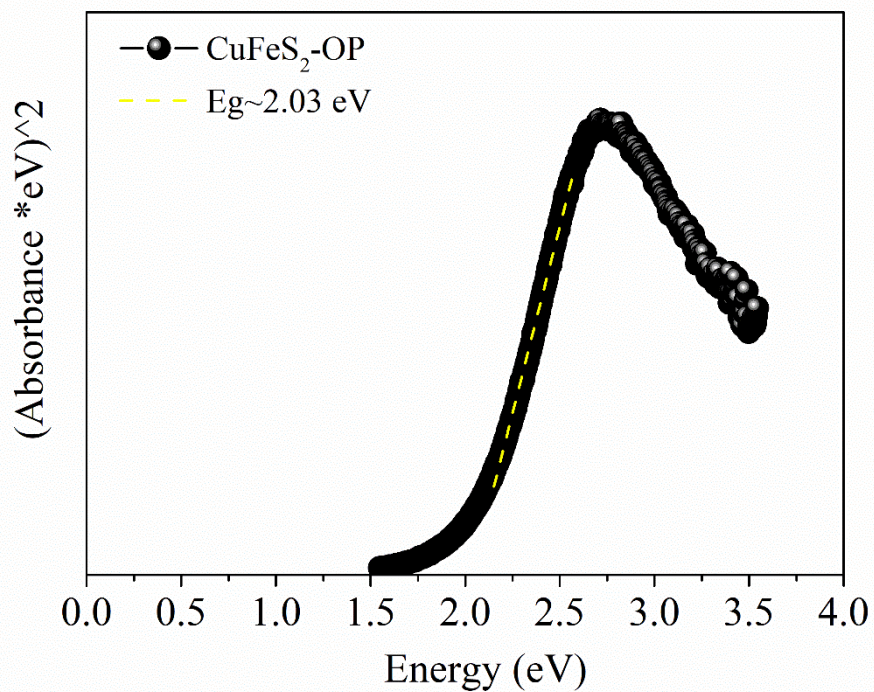

c)

**Figure S3.** Excitation dependent photoluminescence mapping for a) CuFeS<sub>2</sub>-OP b) CuFeS<sub>2</sub>-SDS c) Tauc plot for the CuFeS<sub>2</sub>-OP considering a direct band gap

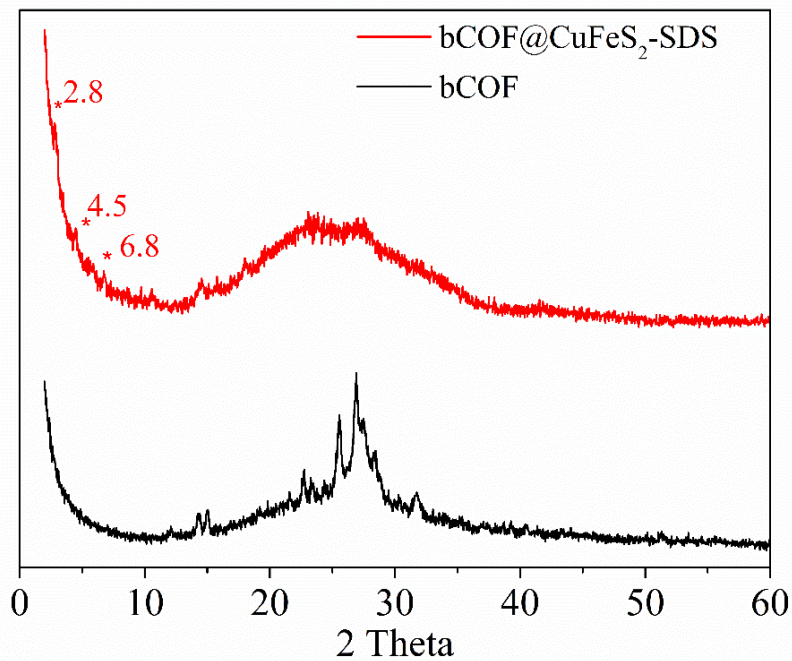

a)

## Supporting Information

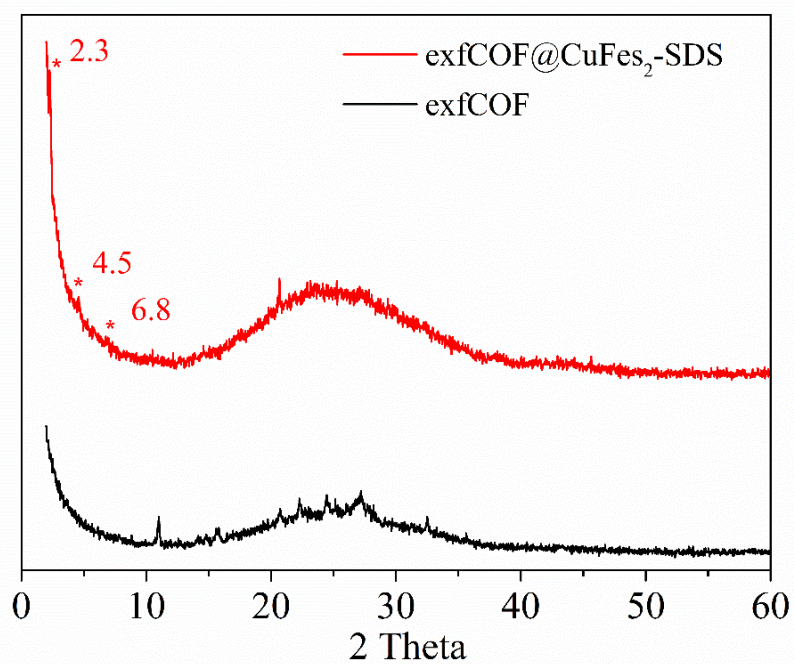

b)

**Figure S4.** XRD patterns as a comparison between the pristine bulk and exfoliated COFs vs their hybrid materials with CuFeS<sub>2</sub>-SDS

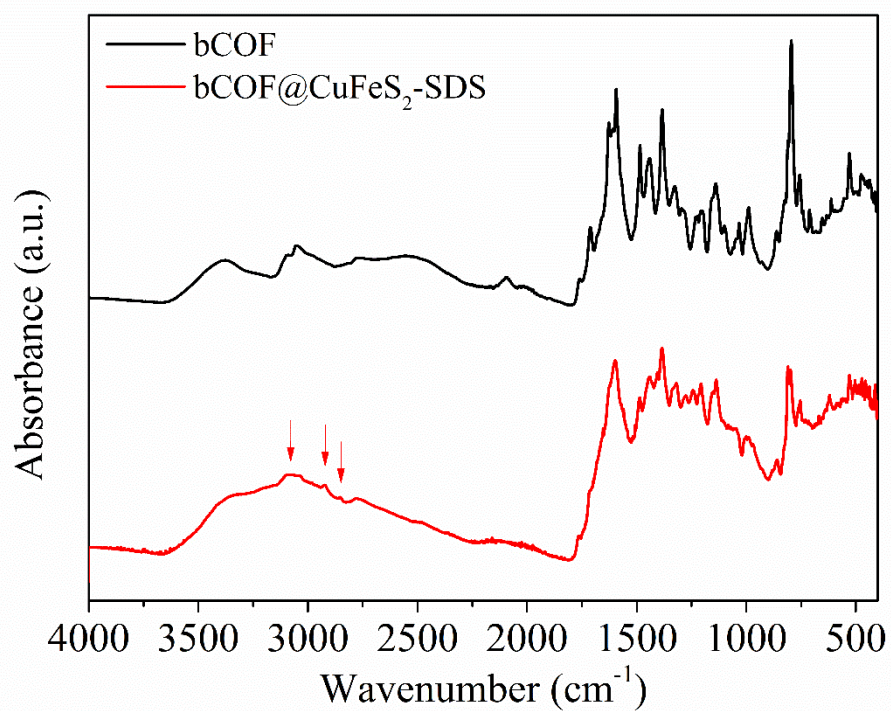

a)

## Supporting Information

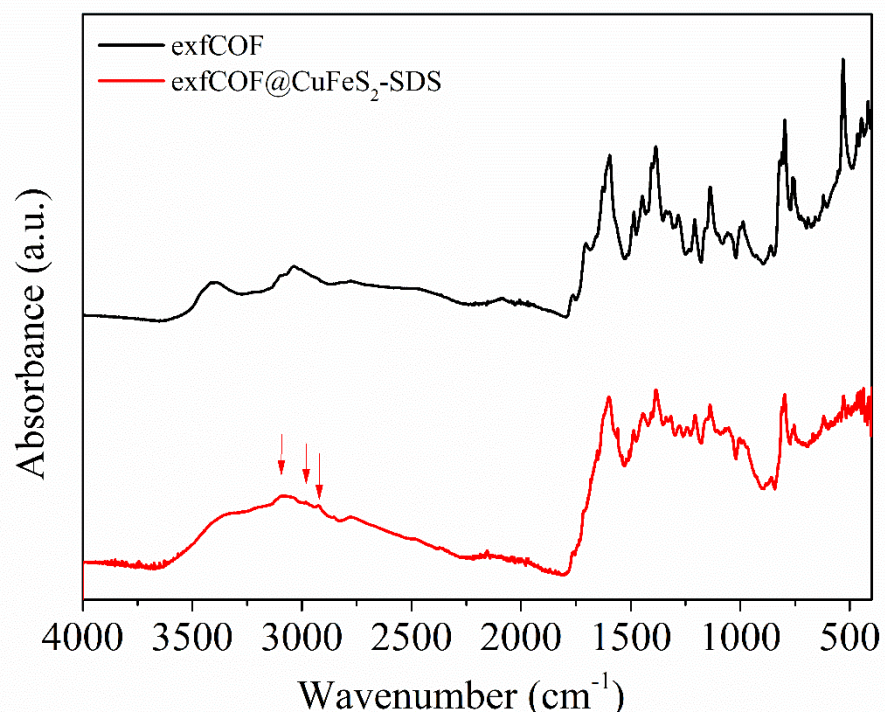

b)

**Figure S5.** FTIR spectra as a comparison between the pristine bulk and exfoliated COFs vs their hybrid materials with CuFeS<sub>2</sub>-SDS

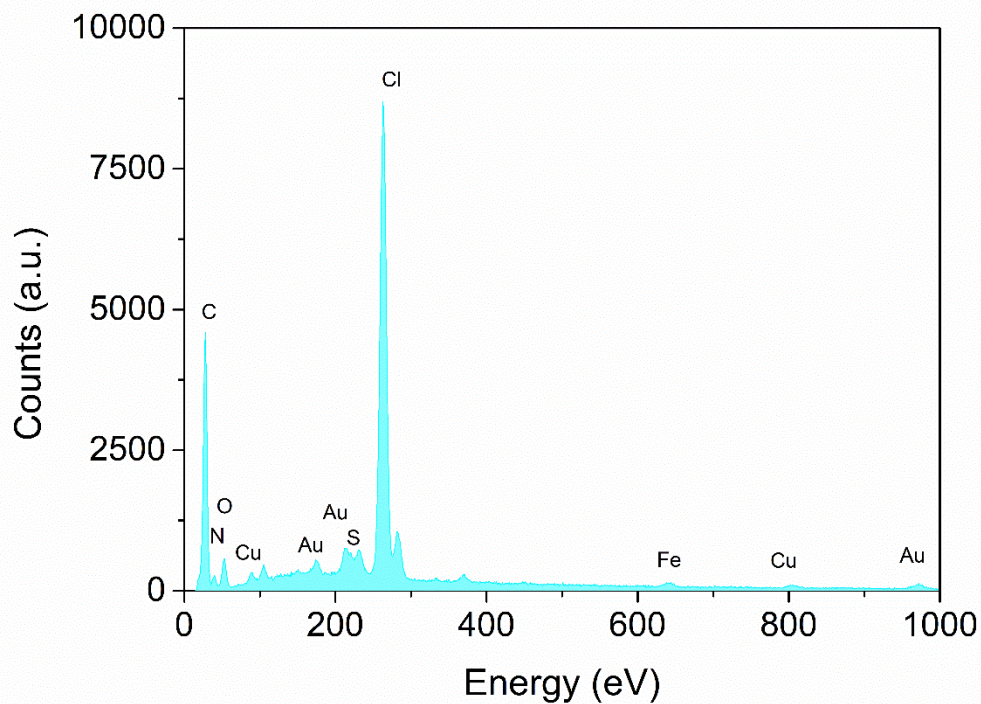

**Figure S6.** EDX spectra of the bCOF@CuFeS<sub>2</sub>-SDS hybrid material.

## Supporting Information

**Table S1.** EDX elemental analysis

| <b>Element</b> | <b>Wt %</b> |
|----------------|-------------|
| <b>C K</b>     | 71.43       |
| <b>N K</b>     | 2.18        |
| <b>Au M</b>    | 2.19        |
| <b>S K</b>     | 0.65        |
| <b>Cl K</b>    | 12.70       |
| <b>Fe K</b>    | 0.36        |
| <b>Cu K</b>    | 0.48        |
| <b>Total</b>   | 100.00      |

# Supporting Information

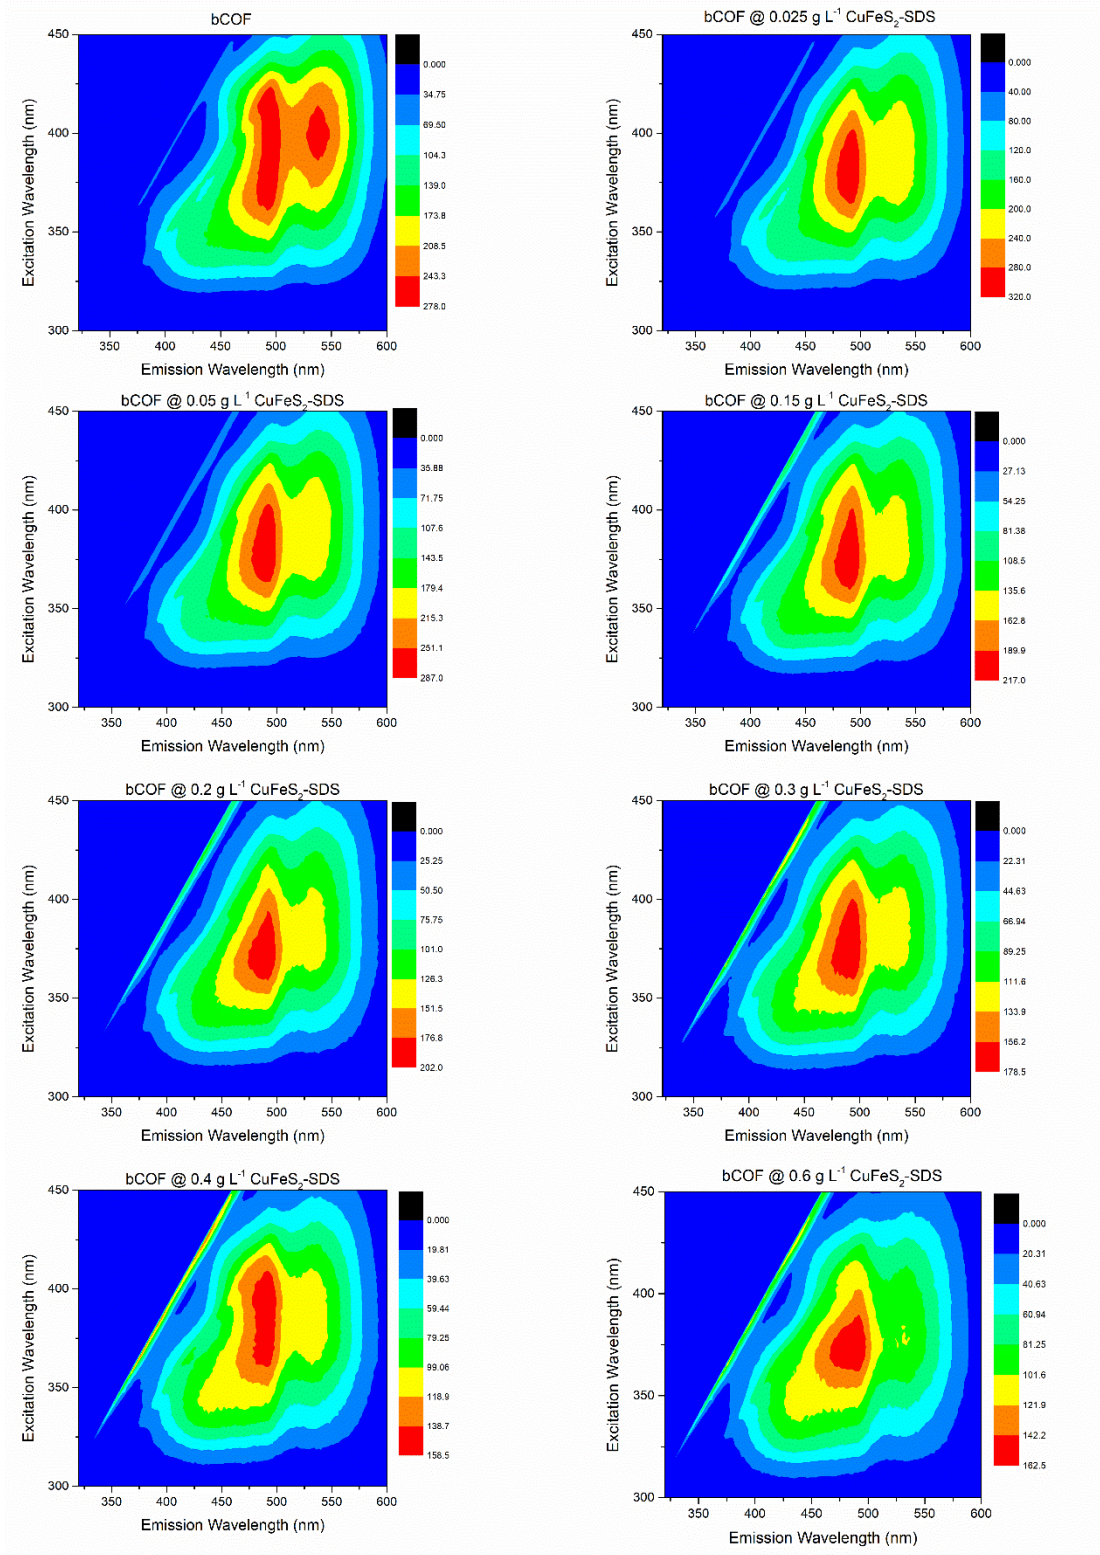



## Supporting Information

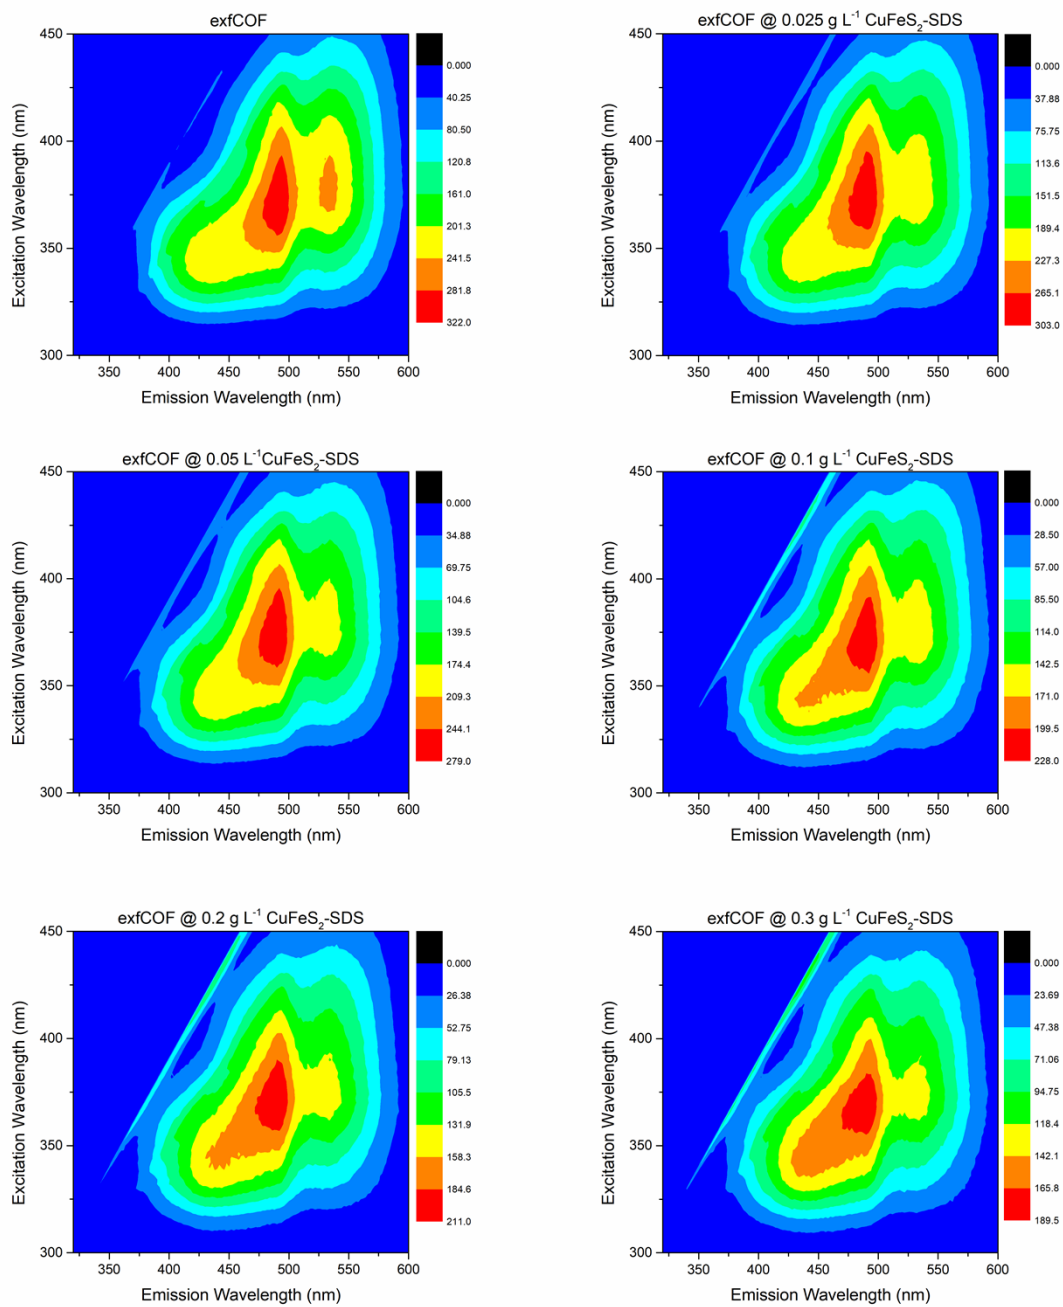

**Figure S7.** Excitation dependent photoluminescence mapping of the CuFeS<sub>2</sub>-SDS titration in 0.2 g L<sup>-1</sup> bCOF and exfCOF aqueous dispersions

# Supporting Information

a)

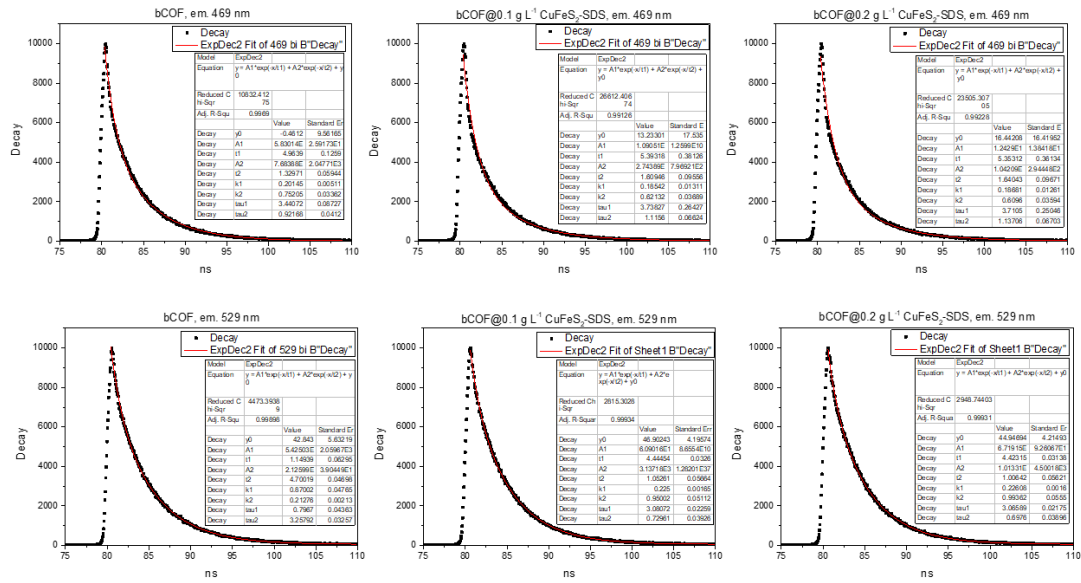

b)

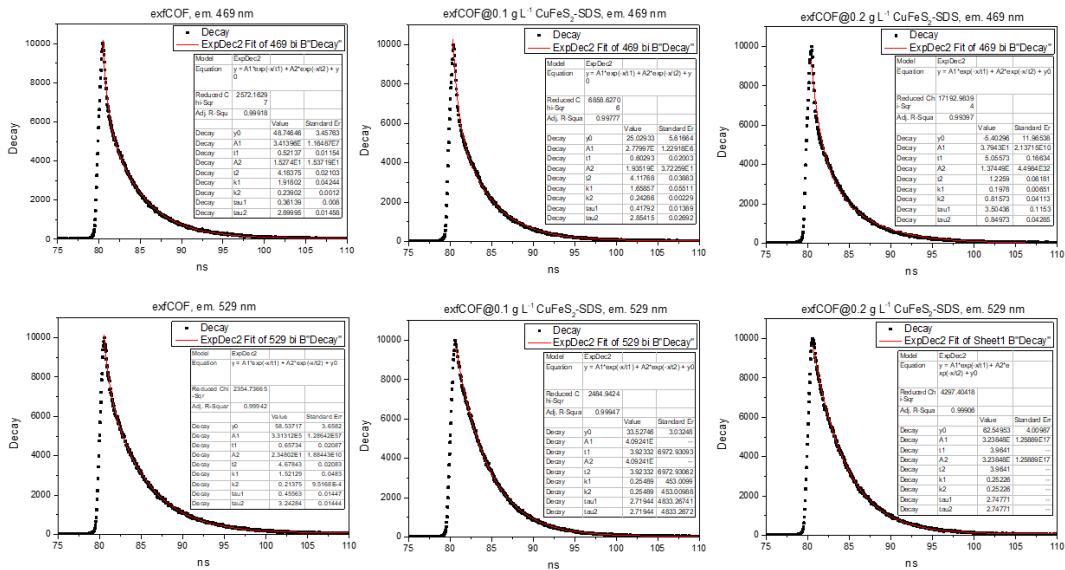

**Figure S8.** Time-resolved photoluminescence spectra and the bi-exponential fitting of a) bCOF and bCOF@CuFeS<sub>2</sub>-SDS and b) exfCOF and exfCOF@CuFeS<sub>2</sub>-SDS at the 469 nm and 529 nm emissions

## Supporting Information

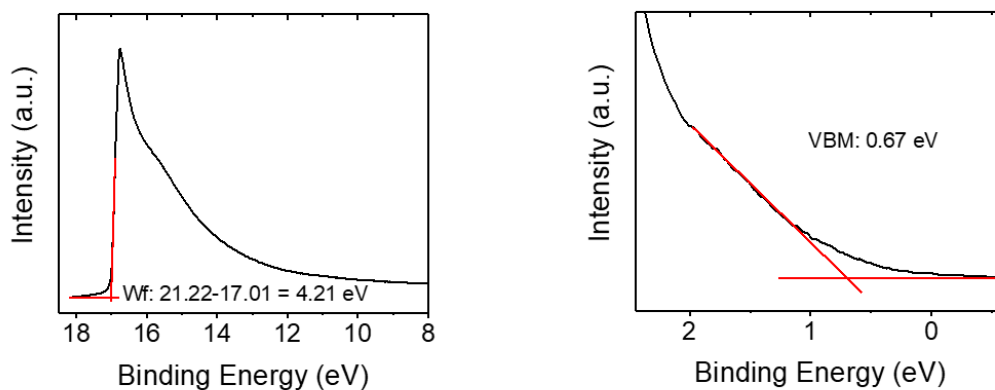

**Figure S9.** UPS measurements of CuFeS<sub>2</sub>-OP nanoparticles on a FTO substrate.

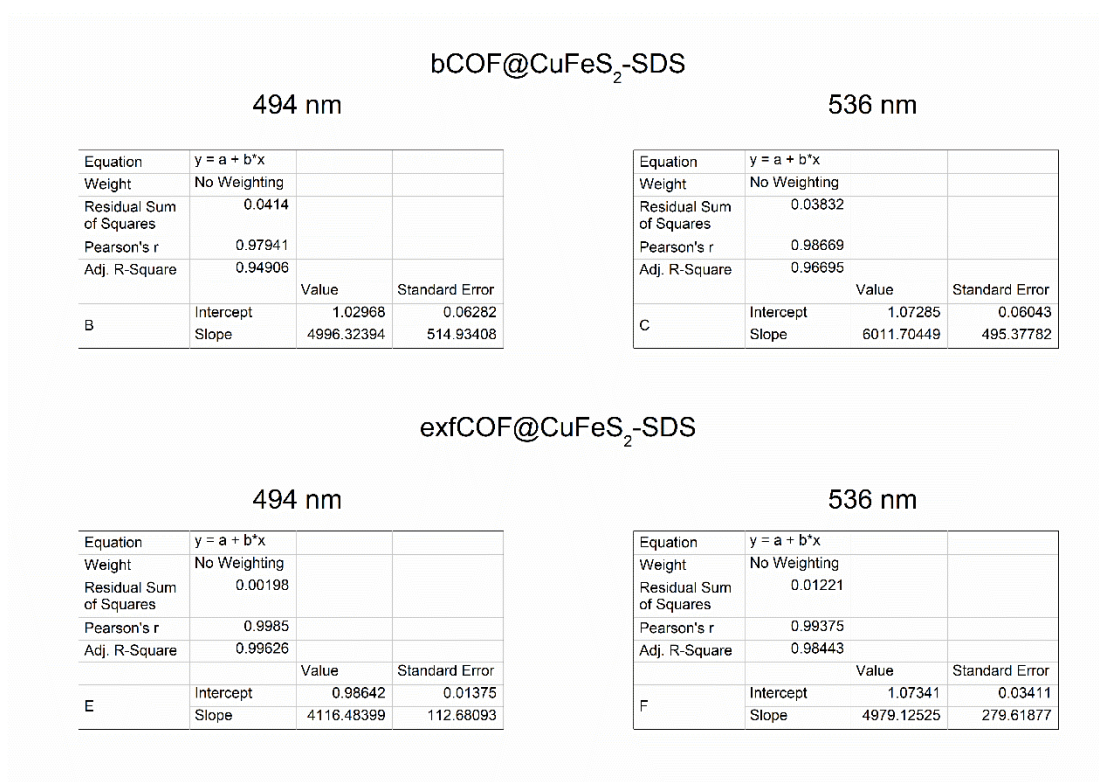

**Figure S10.** Parameters of the linear fitting at the F<sub>0</sub>/F plots of bCOF@CuFeS<sub>2</sub>-SDS and exfCOF@CuFeS<sub>2</sub>-SDS (excitation:410 nm, emissions: 494 nm and 536 nm).

## Supporting Information

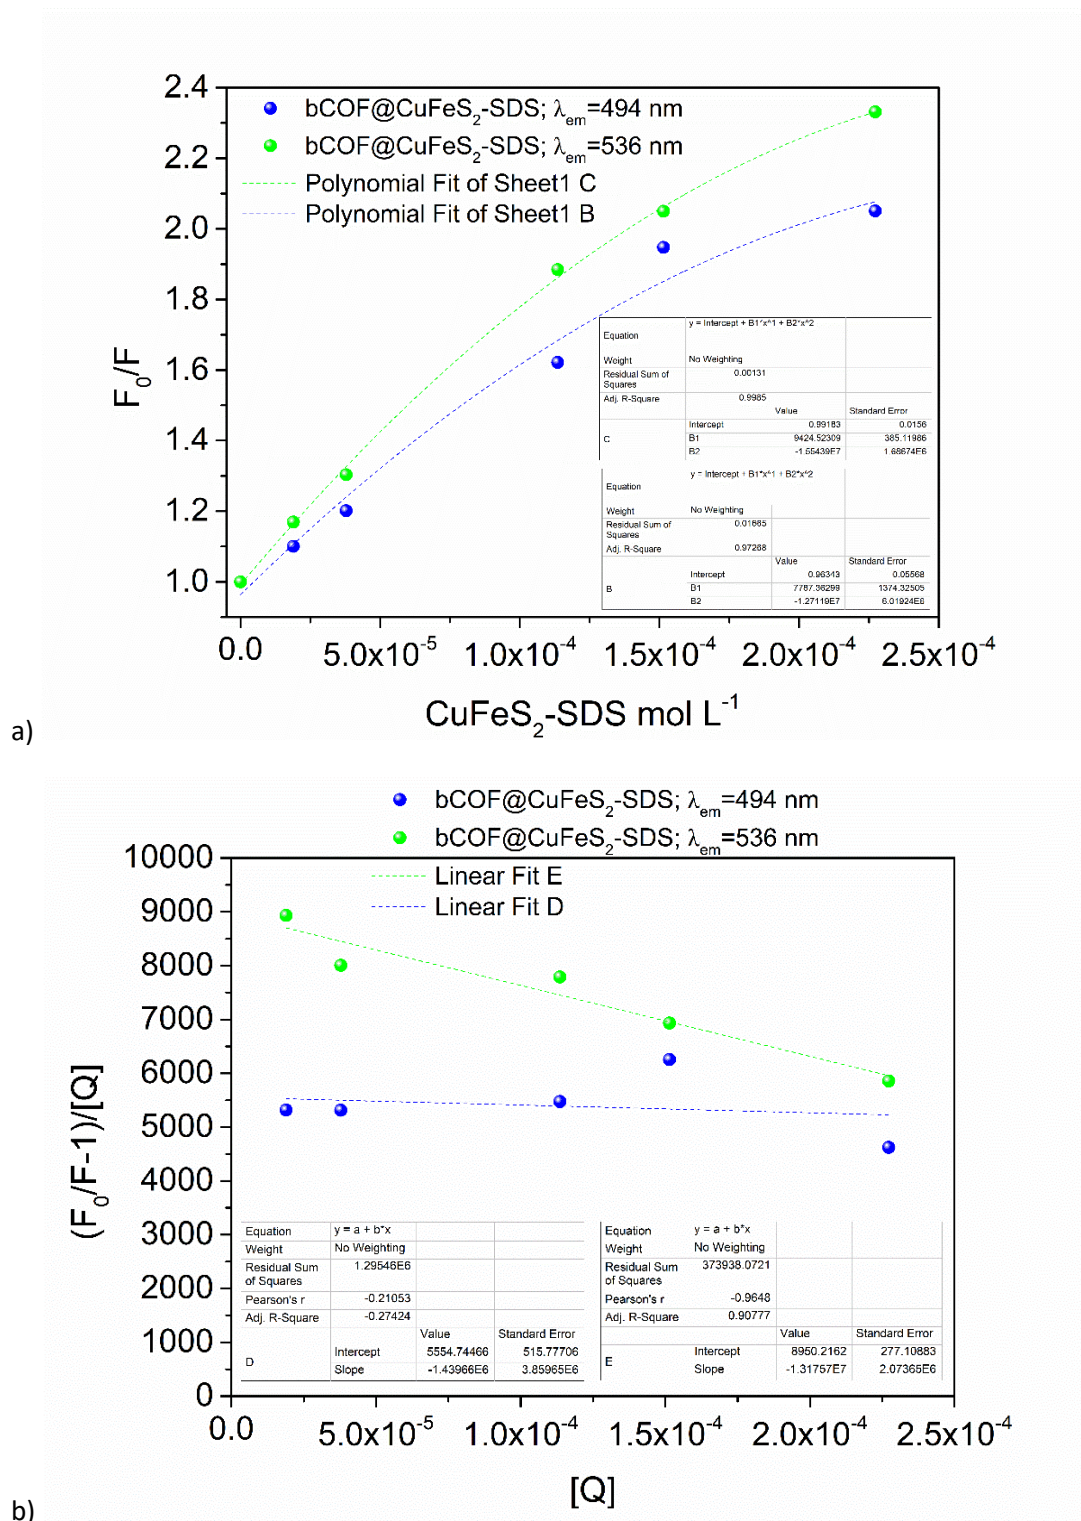

**Figure S11.** a) The polynomial fitting and b) the parameters of the extended S-V,  $(F_0/F-1)/[Q]$  with  $[Q]$  the concentration of the nanoparticles for bCOF@CuFeS<sub>2</sub>-SDS.
